# Supplementary material
Source: publisher site journal article supplement (https://www.dovepress.com/article/431599)
Supplement: Supplementary file 1 [file get_supplementary_file.php]

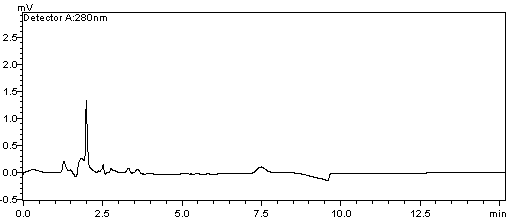


**A**

**B**

**C**

**Tet**

**Tet**

**Fig.S1** Chromatograms of S-LPs (**A**), Tet standard substance (**B**), and S-LPs@Tet (**C**).

**Tab.S1** Precision, reproducibility, recovery, and stability of Tet detected by HPLC method (n = 6).

| Components | Concentration (ng/mL) | Precision (%, RSD) | Reproducibility (%, RSD) | Recovery (%) | Stability (%, RSD) |
| --- | --- | --- | --- | --- | --- |
| Tet | 0.39 | 1.15 | 1.48 | 97.23 | 3.15 |
| 12.50 | 0.97 | 1.59 | 98.71 | 2.57 |
| 50.00 | 0.64 | 1.03 | 99.25 | 2.08 |
